# Supplementary material for: Impact of physical activity on the association of overweight and obesity with cardiovascular disease: The Rotterdam Study
Source: Oxford University Press journal article supplement (doi:10.1177/2047487317693952), 2017-02-28
Supplement: cpr693952_supplementary_material.pdf [file cpr693952_supplementary_material.pdf]

## SUPPLEMENTARY MATERIAL

Table S1. The association between joint physical activity and body mass index phenotypes with cardiovascular disease after taking in account competing risk

|                               |               | n/N      | HR (95%CI)         |
|-------------------------------|---------------|----------|--------------------|
| <b>High physical activity</b> | Normal weight | 125/924  | 1 (reference)      |
|                               | Overweight    | 179/1279 | 1.05 (0.84, 1.32)  |
|                               | Obese         | 63/468   | 1.12 (0.83, 1.51)  |
| <b>Low physical activity</b>  | Normal weight | 145/841  | 1.02 (0.79, 1.30)  |
|                               | Overweight    | 249/1256 | 1.27 (1.02, 1.58)* |
|                               | Obese         | 105/576  | 1.30 (1.01, 1.69)* |

Analyses adjusted for age, gender, education, diet, alcohol, smoking and family history of premature myocardial infarction.

Abbreviations: CI, confidence interval; HR, hazard ratio; n, number of events; N, number at risk.

\*  $p < 0.05$  vs. reference group.

Table S2. The association between joint physical activity and body mass index phenotypes with cardiovascular disease in elderly, aged 65+ (n=3238)

|                               |               | n/N     | HR (95%CI)         |
|-------------------------------|---------------|---------|--------------------|
| <b>High physical activity</b> | Normal weight | 96/524  | 1 (reference)      |
|                               | Overweight    | 142/737 | 1.05 (0.81, 1.36)  |
|                               | Obese         | 54/259  | 1.24 (0.89, 1.74)  |
| <b>Low physical activity</b>  | Normal weight | 115/545 | 1.08 (0.82, 1.42)  |
|                               | Overweight    | 201/800 | 1.34 (1.05, 1.72)* |
|                               | Obese         | 88/373  | 1.36 (1.02, 1.83)* |

Analyses adjusted for age, gender, education, diet, alcohol, smoking and family history of premature myocardial infarction.

Abbreviations: CI, confidence interval; HR, hazard ratio; n, number of events; N, number at risk.

\* p < 0.05 vs. reference group.

Table S3. The association between joint physical activity and body mass index phenotypes with cardiovascular disease, excluding events in the first 2 years (n=5,150)

|                               |               | n/N       | HR (95%CI)         |
|-------------------------------|---------------|-----------|--------------------|
| <b>High physical activity</b> | Normal weight | 101/900   | 1 (reference)      |
|                               | Overweight    | 136/1,236 | 0.96 (0.74, 1.25)  |
|                               | Obese         | 52/457    | 1.12 (0.80, 1.57)  |
| <b>Low physical activity</b>  | Normal weight | 114/810   | 1.13 (0.86, 1.49)  |
|                               | Overweight    | 187/1,194 | 1.30 (1.02, 1.67)* |
|                               | Obese         | 82/553    | 1.33 (0.99, 1.79)  |

Analyses adjusted for age, gender, education, diet, alcohol, smoking and family history of premature myocardial infarction.

Abbreviations: CI, confidence interval; HR, hazard ratio; n, number of events; N, number at risk.

\* p < 0.05 vs. reference group.

Table S4. The association between joint physical activity and body mass index phenotypes with cardiovascular disease, in those without missing dietary quality information (n=4,030)

|                               |               | n/N     | HR (95%CI)         |
|-------------------------------|---------------|---------|--------------------|
| <b>High physical activity</b> | Normal weight | 102/752 | 1 (reference)      |
|                               | Overweight    | 133/991 | 0.99 (0.76, 1.28)  |
|                               | Obese         | 43/372  | 0.94 (0.66, 1.35)  |
| <b>Low physical activity</b>  | Normal weight | 103/612 | 1.11 (0.84, 1.47)  |
|                               | Overweight    | 176/903 | 1.37 (1.07, 1.76)* |
|                               | Obese         | 68/400  | 1.31 (0.96, 1.79)  |

Analyses adjusted for age, gender, education, diet, alcohol, smoking and family history of premature myocardial infarction.

Abbreviations: CI, confidence interval; HR, hazard ratio; n, number of events; N, number at risk.

\*p < 0.05 vs. reference group.
